# Supplementary material for: Influence of pendant 2-[1,2,4]triazol-4-yl-ethylamine and symmetrical bis(pyrazol) ligands on dimensional extension of POM-based compounds
Source: Royal Society of Chemistry journal article supplement (doi:10.1039/c7ra03884d), 2017-01-01
Supplement: c7ra03884d1.pdf [file c7ra03884d1.pdf]

## Supporting Information

### The influence of pendant 2-[1,2,4]triazol-4-yl-ethylamine and symmetrical bis(pyrazol) ligands on dimensional extension of POM-based compounds†

Aixiang Tian,\* Huaiping Ni, Xuebin Ji, Yan Tian, Guocheng Liu, Jun Ying\*

*Department of Chemistry, Bohai University, Jinzhou 121013, P. R. China*

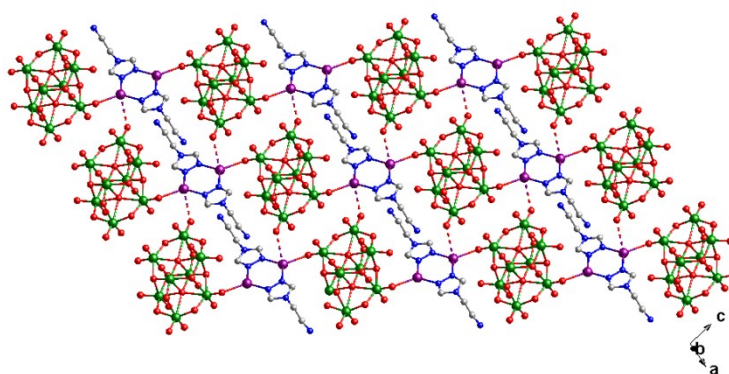

**Fig. S1.** The 2D supramolecular layer of compound **2** through hydrogen bonding interactions ( $O5 \cdots Ag1 = 2.923 \text{ \AA}$ ).

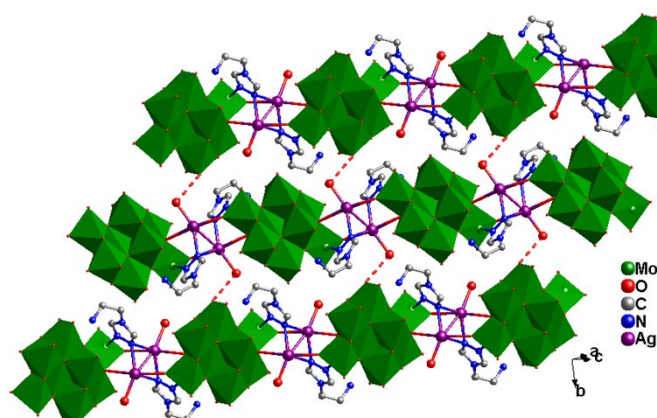

**Fig. S2.** The 2D supramolecular layer of compound **3** through hydrogen bonding interactions ( $O1W \cdots O7 = 2.868 \text{ \AA}$ ).

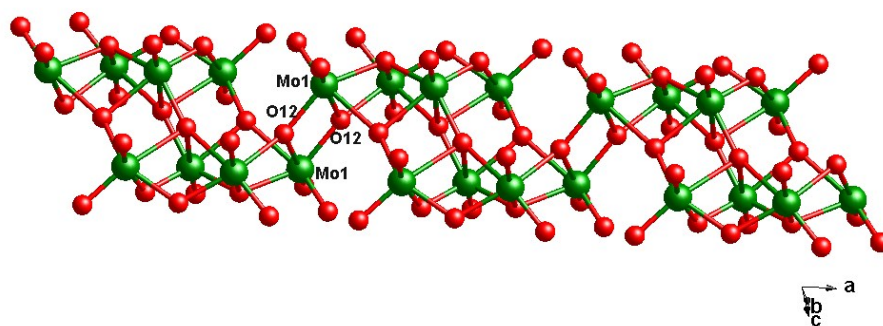

**Fig. S3.** The 1D inorganic Mo-chain of **4** by adjacent  $\beta$ - $\text{Mo}_8$  anions connecting each other through Mo1-O12 bonds.

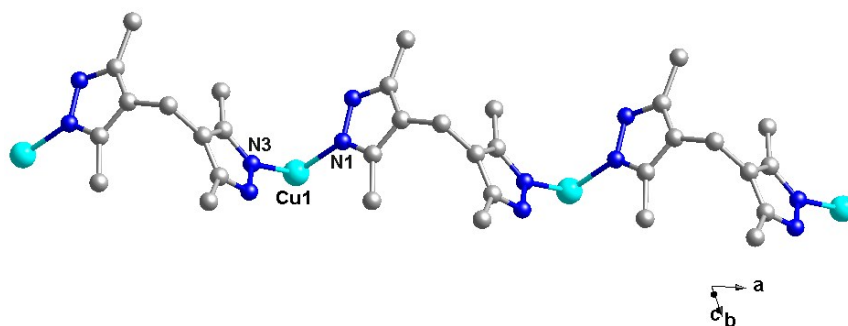

**Fig. S4.** The 1D zigzag Cu- $\text{H}_2\text{bdpm}$  chain of **4**.

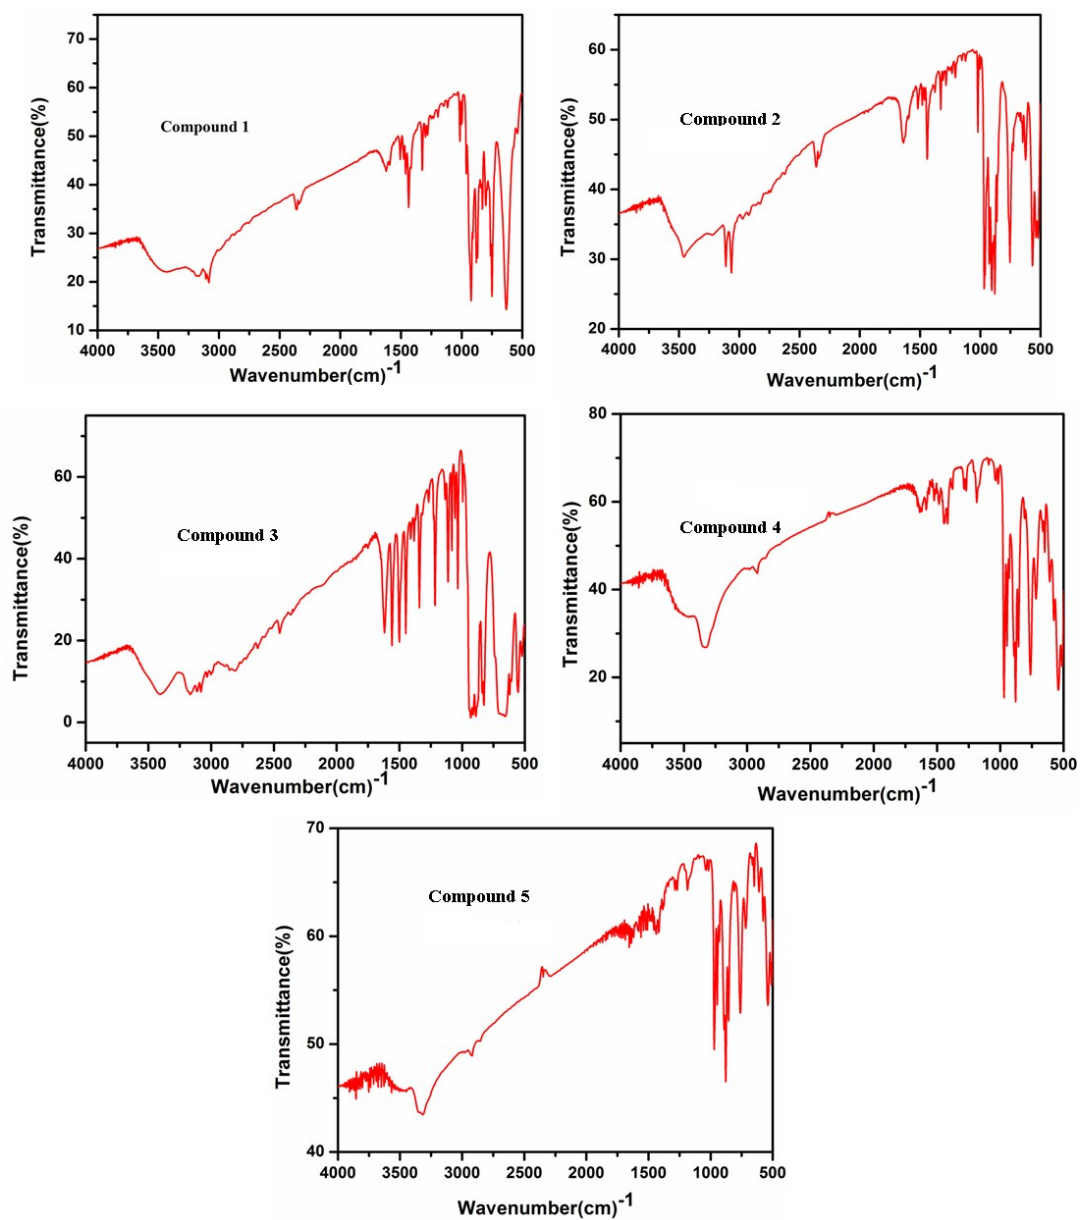

**Fig. S5.** The IR spectra of compounds **1**, **2**, **3**, **4** and **5**.

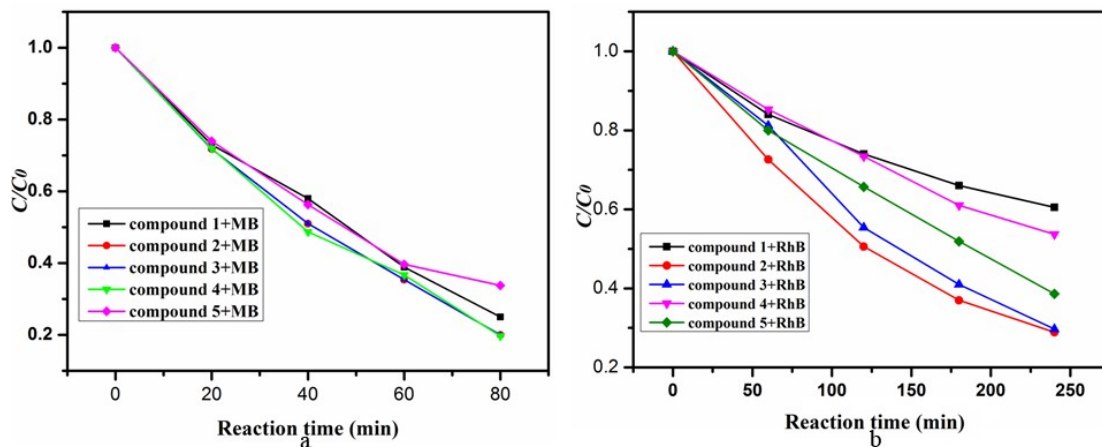

**Fig. S6.** Photocatalytic decomposition rates of MB (a) and RhB (b) solutions under UV irradiation with the use of compounds **1**, **2**, **3**, **4** and **5**.

Table S1. Selected bond distances (Å) and angles (°) for compounds **1–5**.

| Compound <b>1</b>    |            |                       |            |
|----------------------|------------|-----------------------|------------|
| N(1)-Cu(2)           | 2.052(6)   | O(1W)-Cu(1)           | 1.924(5)   |
| O(1W)-Cu(2)          | 1.943(5)   | N(2)-Cu(1)            | 1.992(6)   |
| Cu(2)-O(1W)#3        | 1.943(5)   | Cu(2)-N(1)#3          | 1.943(5)   |
| Cu(2)-N(1)#3         | 2.052(6)   | Cu(2)-O(10)#3         | 2.359(5)   |
| Cu(2)-O(10)          | 2.359(5)   | Cu(1)-O(2W)           | 1.962(6)   |
| Cu(1)-O(8)#4         | 1.982(5)   | Cu(1)-O(12)           | 2.394(5)   |
| Cu(1)-K(1)           | 3.579(2)   | O(8)-Cu(1)#6          | 1.982(5)   |
| C(1)-N(1)-Cu(2)      | 135.0(5)   | N(2)-N(1)-Cu(2)       | 117.7(4)   |
| Cu(1)-O(1W)-Cu(2)    | 120.0(2)   | C(2)-N(2)-Cu(1)       | 132.6(5)   |
| N(1)-N(2)-Cu(1)      | 119.3(4)   | O(1W)#3-Cu(2)-O(1W)   | 179.999(1) |
| O(1W)#3-Cu(2)-N(1)   | 90.3(2)    | O(1W)-Cu(2)-N(1)      | 89.7(2)    |
| O(1W)#3-Cu(2)-N(1)#3 | 89.7(2)    | O(1W)-Cu(2)-N(1)#3    | 90.3(2)    |
| N(1)-Cu(2)-N(1)#3    | 179.999(1) | O(1W)#3-Cu(2)-O(10)#3 | 92.54(19)  |
| O(1W)-Cu(2)-O(10)#3  | 87.46(19)  | N(1)-Cu(2)-O(10)#3    | 90.2(2)    |
| N(1)#3-Cu(2)-O(10)#3 | 89.8(2)    | O(1W)#3-Cu(2)-O(10)   | 87.46(19)  |
| O(1W)-Cu(2)-O(10)    | 92.54(19)  | N(1)-Cu(2)-O(10)      | 89.8(2)    |
| N(1)#3-Cu(2)-O(10)   | 90.2(2)    | O(10)#3-Cu(2)-O(10)   | 180.000(1) |

|                      |            |                    |            |
|----------------------|------------|--------------------|------------|
| O(1W)-Cu(1)-O(2W)    | 89.9(3)    | O(1W)-Cu(1)-O(12)  | 89.64(19)  |
| O(2W)-Cu(1)-O(12)    | 91.7(2)    | O(8)#4-Cu(1)-O(12) | 103.42(19) |
| N(2)-Cu(1)-O(12)     | 86.9(2)    | O(1W)-Cu(1)-K(1)   | 96.47(15)  |
| O(2W)-Cu(1)-K(1)     | 6.9(2)     | O(8)#4-Cu(1)-K(1)  | 83.30(14)  |
| N(2)-Cu(1)-K(1)      | 171.51(17) | O(12)-Cu(1)-K(1)   | 89.33(14)  |
| Mo(1)#1-O(8)-Cu(1)#6 | 146.6(3)   | Cu(1)#6-O(8)-Mo(3) | 100.54(18) |
| Mo(3)-O(10)-Cu(2)    | 169.2(3)   | Mo(1)-O(12)-Cu(1)  | 170.2(3)   |
| O(2W)-K(1)-Cu(1)     | 8.3(3)     | O(5)#2-K(1)-Cu(1)  | 97.10(17)  |
| K(1)#7-K(1)-Cu(1)    | 133.89(10) | O(7)#2-K(1)-Cu(1)  | 80.32(11)  |
| Mo(4)#2-K(1)-Cu(1)   | 103.97(5)  | Mo(2)#2-K(1)-Cu(1) | 90.50(4)   |
| K(1)-O(2W)-Cu(1)     | 164.8(5)   |                    |            |

Symmetry codes: #1 -x,-1,-y+1,-z    #2 -x,-y+1,-z    #3 -x,-y+1,-z+1    #4  
x+1,y,z    #5 -x-1,-y+2,-z    #6 x-1,y,z    #7 -x,-y,-z

#### Compound 2

|                   |            |                   |            |
|-------------------|------------|-------------------|------------|
| Ag(1)-N(2)#2      | 2.221(4)   | Ag(1)-N(1)        | 2.253(4)   |
| Ag(1)-O(1)        | 2.320(3)   | N(2)-Ag(1)#2      | 2.221(4)   |
| N(2)#2-Ag(1)-N(1) | 121.40(13) | N(2)#2-Ag(1)-O(1) | 126.70(12) |
| N(1)-Ag(1)-O(1)   | 111.86(12) | Mo(4)-O(1)-Ag(1)  | 131.57(17) |
| C(1)-N(1)-Ag(1)   | 133.9(3)   | N(2)-N(1)-Ag(1)   | 119.3(3)   |
| C(2)-N(2)-Ag(1)#2 | 133.8(3)   | N(1)-N(2)-Ag(1)#2 | 119.2(3)   |

Symmetry codes: 1 -x,-y,-z+1    #2 -x-1,-y,-z

#### Compound 3

|               |          |                |          |
|---------------|----------|----------------|----------|
| O(6)-Ag(1')#2 | 2.341(3) | O(6)-Ag(1)#2   | 2.493(4) |
| O(9)-Ag(1)    | 2.493(3) | N(1)-Ag(1')    | 2.347(5) |
| N(1)-Ag(1)    | 2.394(4) | N(1)-Ag(1)#2   | 2.491(4) |
| Ag(1)-Ag(1')  | 0.625(2) | Ag(1)-O(1W)    | 2.412(4) |
| Ag(1)-N(1)#2  | 2.491(4) | Ag(1)-O(6)#2   | 2.493(4) |
| Ag(1)-Ag(1)#2 | 2.656(4) | Ag(1)-Ag(1')#2 | 3.041(2) |
| Ag(1')-O(1W)  | 2.266(4) | Ag(1')-O(6)#2  | 2.341(3) |

|                       |            |                        |            |
|-----------------------|------------|------------------------|------------|
| Ag(1')-Ag(1)#2        | 3.041(2)   | Mo(2)-O(6)-Ag(1')#2    | 147.81(19) |
| Mo(2)-O(6)-Ag(1)#2    | 133.79(17) | Ag(1')#2-O(6)-Ag(1)#2  | 14.42(6)   |
| Mo(1)-O(9)-Ag(1)      | 119.11(13) | Mo(2)-O(9)-Ag(1)       | 104.73(11) |
| Mo(3)-O(9)-Ag(1)      | 116.12(11) | C(1)-N(1)-Ag(1')       | 112.5(3)   |
| N(2)-N(1)-Ag(1')      | 123.8(3)   | C(1)-N(1)-Ag(1)        | 126.7(3)   |
| N(2)-N(1)-Ag(1)       | 117.5(3)   | Ag(1')-N(1)-Ag(1)      | 15.11(6)   |
| C(1)-N(1)-Ag(1)#2     | 126.4(3)   | N(2)-N(1)-Ag(1)#2      | 110.2(3)   |
| Ag(1')-N(1)-Ag(1)#2   | 77.81(13)  | Ag(1)-N(1)-Ag(1)#2     | 65.86(12)  |
| Ag(1')-Ag(1)-N(1)     | 78.2(3)    | Ag(1')-Ag(1)-O(1W)     | 69.2(3)    |
| N(1)-Ag(1)-O(1W)      | 138.22(15) | Ag(1')-Ag(1)-N(1)#2    | 140.7(4)   |
| N(1)-Ag(1)-N(1)#2     | 114.14(12) | O(1W)-Ag(1)-N(1)#2     | 107.63(15) |
| Ag(1')-Ag(1)-O(6)#2   | 68.9(3)    | N(1)-Ag(1)-O(6)#2      | 91.56(13)  |
| O(1W)-Ag(1)-O(6)#2    | 99.97(14)  | N(1)#2-Ag(1)-O(6)#2    | 73.44(12)  |
| Ag(1')-Ag(1)-O(9)     | 98.2(3)    | N(1)-Ag(1)-O(9)        | 78.93(12)  |
| O(1W)-Ag(1)-O(9)      | 80.58(13)  | N(1)#2-Ag(1)-O(9)      | 120.45(13) |
| O(6)#2-Ag(1)-O(9)     | 165.44(12) | Ag(1')-Ag(1)-Ag(1)#2   | 122.8(4)   |
| N(1)-Ag(1)-Ag(1)#2    | 58.83(12)  | O(1W)-Ag(1)-Ag(1)#2    | 162.95(14) |
| N(1)#2-Ag(1)-Ag(1)#2  | 55.32(11)  | O(6)#2-Ag(1)-Ag(1)#2   | 75.96(11)  |
| O(9)-Ag(1)-Ag(1)#2    | 107.58(11) | Ag(1')-Ag(1)-Ag(1')#2  | 132.7(3)   |
| N(1)-Ag(1)-Ag(1')#2   | 65.78(11)  | O(1W)-Ag(1)-Ag(1')#2   | 155.28(12) |
| N(1)#2-Ag(1)-Ag(1')#2 | 48.99(11)  | O(6)#2-Ag(1)-Ag(1')#2  | 82.08(9)   |
| O(9)-Ag(1)-Ag(1')#2   | 103.58(8)  | Ag(1)#2-Ag(1)-Ag(1')#2 | 9.95(6)    |
| Ag(1)-Ag(1')-O(1W)    | 95.9(3)    | Ag(1)-Ag(1')-O(6)#2    | 96.7(3)    |
| O(1W)-Ag(1')-O(6)#2   | 109.24(15) | Ag(1)-Ag(1')-N(1)      | 86.7(3)    |
| O(1W)-Ag(1')-N(1)     | 153.40(16) | O(6)#2-Ag(1')-N(1)     | 96.67(13)  |
| Ag(1)-Ag(1')-Ag(1)#2  | 47.3(3)    | O(1W)-Ag(1')-Ag(1)#2   | 141.23(15) |
| O(6)#2-Ag(1')-Ag(1)#2 | 70.86(9)   | N(1)-Ag(1')-Ag(1)#2    | 53.20(11)  |
| Ag(1')-O(1W)-Ag(1)    | 14.94(6)   |                        |            |

Symmetry codes: #1 -x,-y+1,-z+1 #2 -x+1,-y+1,-z+2

Compound 4

|                                                                                  |           |                   |           |
|----------------------------------------------------------------------------------|-----------|-------------------|-----------|
| Cu(1)-O(3)                                                                       | 1.948(10) | Cu(1)-N(1)#2      | 1.956(14) |
| Cu(1)-O(7)                                                                       | 1.953(10) | Cu(1)-N(3)        | 1.955(14) |
| N(1)-Cu(1)#3                                                                     | 1.956(14) | O(3)-Cu(1)-N(1)#2 | 165.8(5)  |
| O(3)-Cu(1)-O(7)                                                                  | 86.8(4)   | N(1)#2-Cu(1)-O(7) | 93.1(5)   |
| O(3)-Cu(1)-N(3)                                                                  | 90.2(5)   | N(1)#2-Cu(1)-N(3) | 93.1(6)   |
| O(7)-Cu(1)-N(3)                                                                  | 166.2(5)  | C(3)-N(1)-Cu(1)#3 | 133.4(13) |
| N(2)-N(1)-Cu(1)#3                                                                | 121.1(12) | Mo(2)-O(3)-Cu(1)  | 154.4(6)  |
| C(9)-N(3)-Cu(1)                                                                  | 131.7(11) | N(4)-N(3)-Cu(1)   | 121.0(11) |
| Mo(3)-O(7)-Cu(1)                                                                 | 153.9(6)  |                   |           |
| Symmetry codes: #1 -x-1,-y+1,-z+1    #2 x-1,y,z    #3 x+1,y,z    #4 -x,-y+1,-z+1 |           |                   |           |

Compound 5

|                                                                    |          |                    |            |
|--------------------------------------------------------------------|----------|--------------------|------------|
| Ag(2)-N(1)                                                         | 2.155(5) | Ag(2)-N(4)#1       | 2.160(6)   |
| Ag(2)-O(11)                                                        | 2.511(5) | Ag(1)-N(3)         | 2.212(5)   |
| Ag(1)-O(11)                                                        | 2.670(5) | Ag(1)-O(6)         | 2.819(5)   |
| Ag(1)-O(7)                                                         | 2.801(6) | Ag(1)-O(5)         | 2.772(6)   |
| Ag(1)-N(2)#3                                                       | 2.208(5) | N(4)-Ag(2)#4       | 2.160(6)   |
| N(2)-Ag(1)#3                                                       | 2.208(5) | N(1)-Ag(2)-O(11)   | 89.59(18)  |
| N(1)-Ag(2)-N(4)#1                                                  | 160.8(2) | N(4)#1-Ag(2)-O(11) | 103.70(18) |
| N(3)-Ag(1)-N(2)#3                                                  | 165.8(2) | C(1)-N(2)-Ag(1)#3  | 127.7(5)   |
| N(1)-N(2)-Ag(1)#3                                                  | 124.3(4) | C(7)-N(3)-Ag(1)    | 124.3(4)   |
| N(4)-N(3)-Ag(1)                                                    | 127.6(4) | C(2)-N(1)-Ag(2)    | 125.3(5)   |
| N(2)-N(1)-Ag(2)                                                    | 126.9(4) | Mo(1)-O(11)-Ag(2)  | 134.2(3)   |
| C(8)-N(4)-Ag(2)#4                                                  | 124.8(4) | N(3)-N(4)-Ag(2)#4  | 128.3(4)   |
| Symmetry codes: #1 x,y-1,z    #2 -x+1,-y-2,-z+1    #3 -x+1,-y,-z+2 |          |                    |            |
| #4 x,y+1,z                                                         |          |                    |            |
